# Supplementary material
Source: publisher site journal article supplement (https://www.dovepress.com/article/275481)
Supplement: Supplementary file 1 [file get_supplementary_file.php]

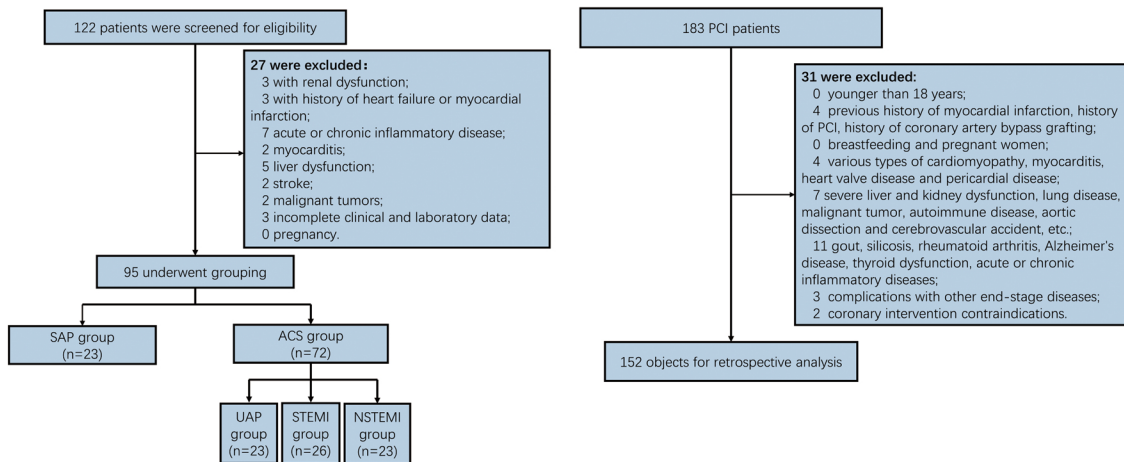

Figure S1 Flow chart of enrollment.

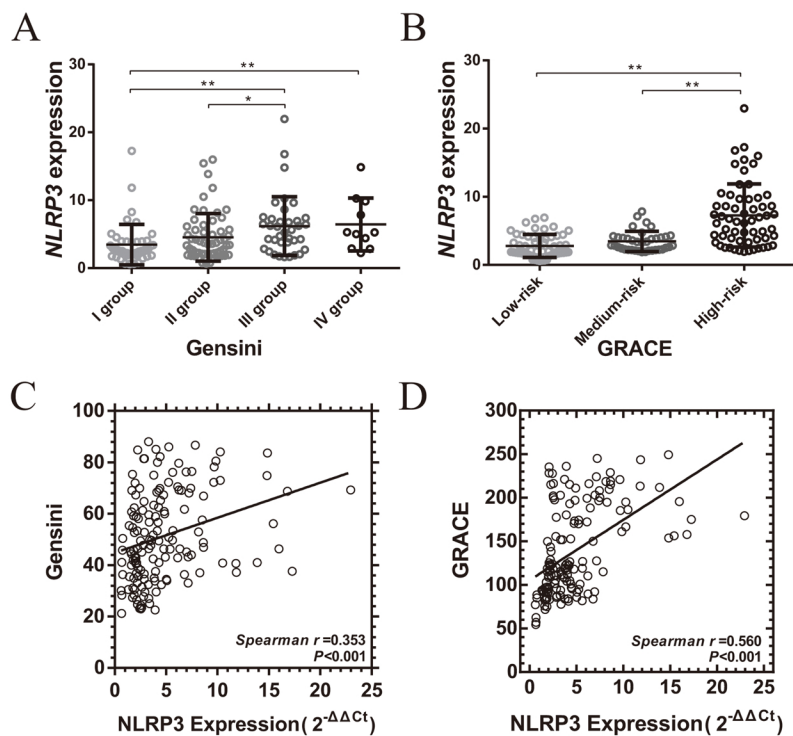

**Figure S2** Relationship between platelet *NLRP3* and clinical scores. (A) Comparison of the *NLRP3* expression for different levels of Gensini score (I group, n=45; II group, n=59; III group, n=37; IV group, n=11). (B) Comparison of the *NLRP3* expression for different levels of GRACE score (Low-risk, n=54; Medium-risk, n=38; High-risk, n=60). (C) Scatter plot of correlation between Gensini score and *NLRP3* expression in platelets. Correlation between platelet *NLRP3* and the Gensini risk score,  $r=0.353$ ,  $P<0.001$  (n=152). (D) Scatter plot of correlation between GRACE score and *NLRP3* expression in platelets. Correlation between platelet *NLRP3* and the GRACE risk score,  $r=0.561$ ,  $P<0.001$  (n=152).  $P<0.05^*$ ,  $P<0.01^{**}$ . **Abbreviations:** Gensini, Global Registry of Acute Coronary Events. GRACE, Global Registry of Acute Coronary Events.
